# Supplementary material for: A unique RPW8-encoding class of genes that originated in early land plants and evolved through domain fission, fusion, and duplication
Source: PubMed Central journal article supplement (PMC5039405; doi:10.1038/srep32923), 2016-09-28
Supplement: srep32923-s1.pdf [file srep32923-s1.pdf]

## Supporting Information

**Article title:** A unique RPW8-encoding class of genes that originated in early land plants and evolved through domain fission, fusion and duplication

**Authors:** Yan Zhong, Zong-Ming (Max) Cheng

**Fig. S1. Phylogenetic analysis of RPW8-encoding genes in five Rosaceae species.**

Blue circle: strawberry, green circle: apple, yellow circle: pear, red circle: peach, purple circle: mei.

**Fig. S2. Disorder residue values in the RPW8 domain (A) and the NBS domain**

**(B) of RPW8-encoding gene in *P. patens*.** Dashed line means the predicted disorder probability of each amino acid in the RPW8 domain and the NBS domain, and the red line represents the threshold of the disorder probability.

**Fig. S3. Phylogenetic tree of RPW8-encoding genes in 20 plant species.**

Blue branch indicates RPW8-NBS genes, and pink branch shows RPW8-non-NBS genes. Red circle on node means one species-specific duplication event, and red diamond on node means two duplication events.

**Fig. S4. Average  $Ka/Ks$  values of the RPW8 domains between RPW8-only and**

**RPW8-NBS genes in six species.** The black and gray columns represent RPW8 domains from RPW8-only and RPW8-NBS genes, respectively.

Fig. S1

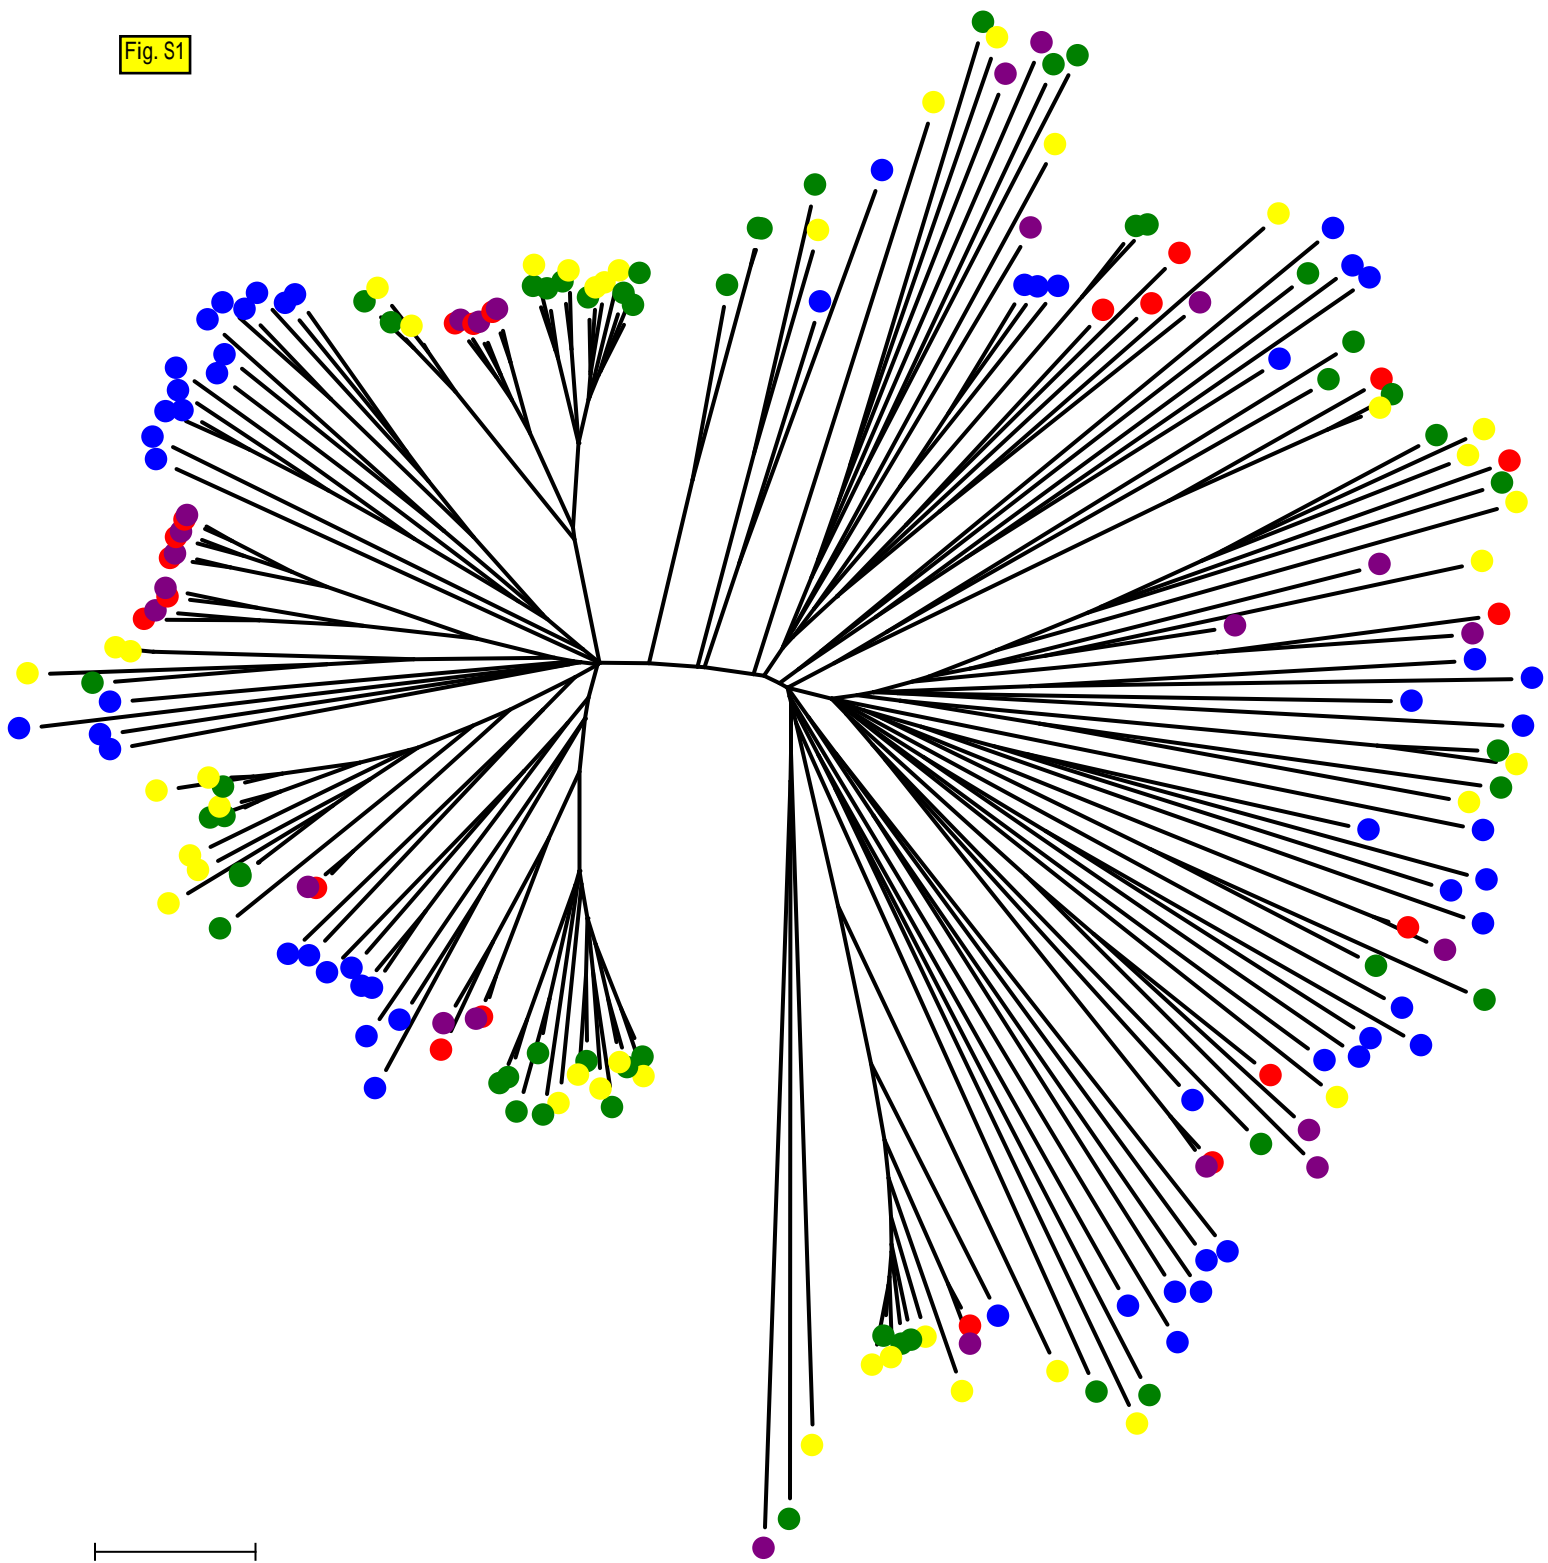

Fig. S2

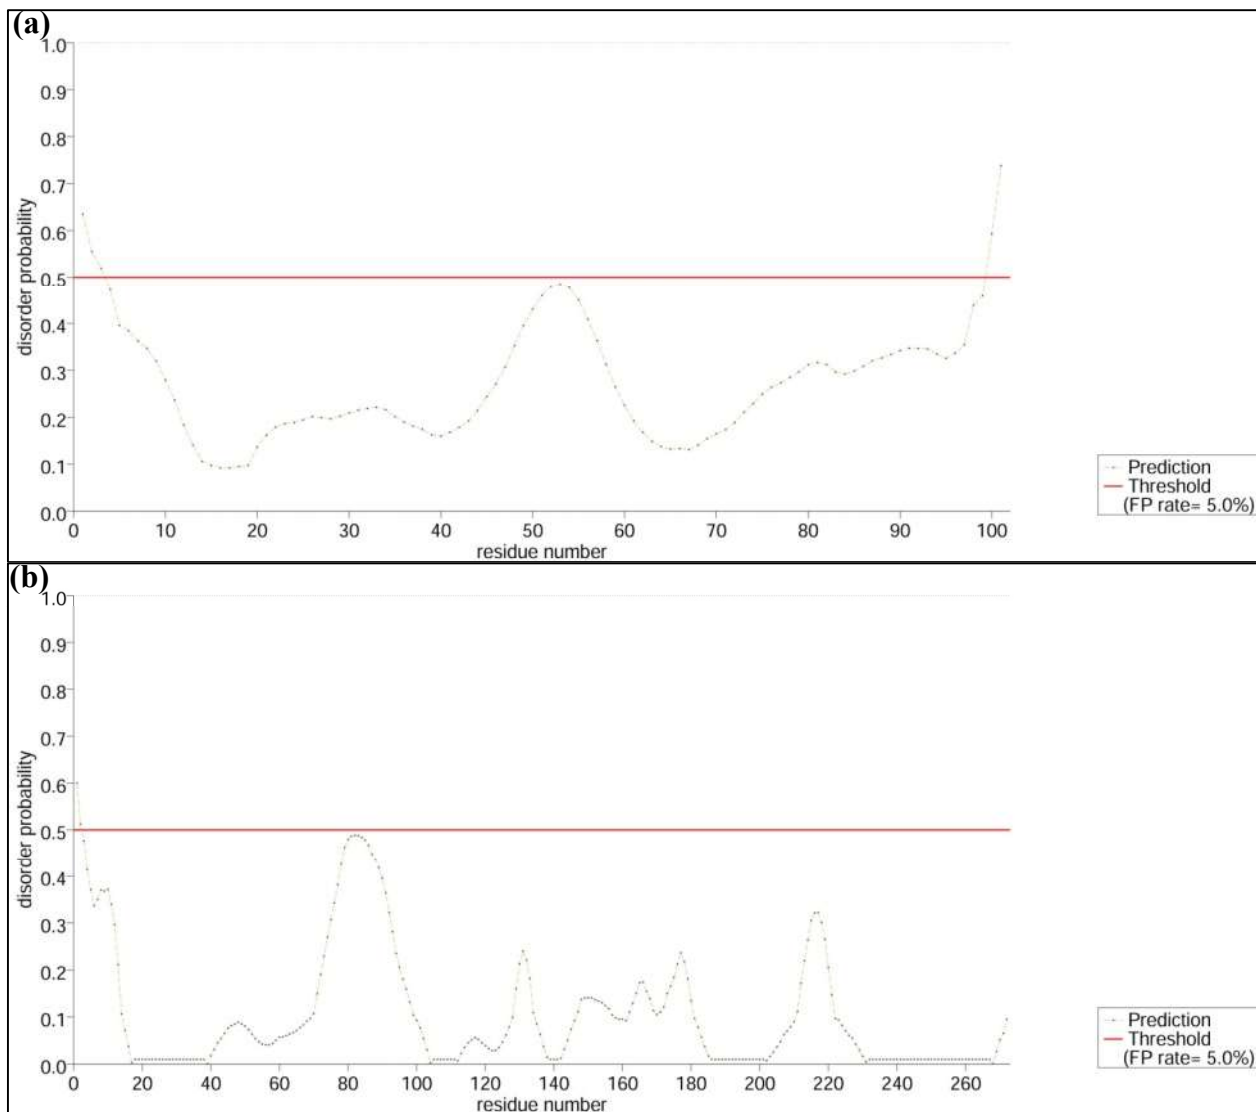

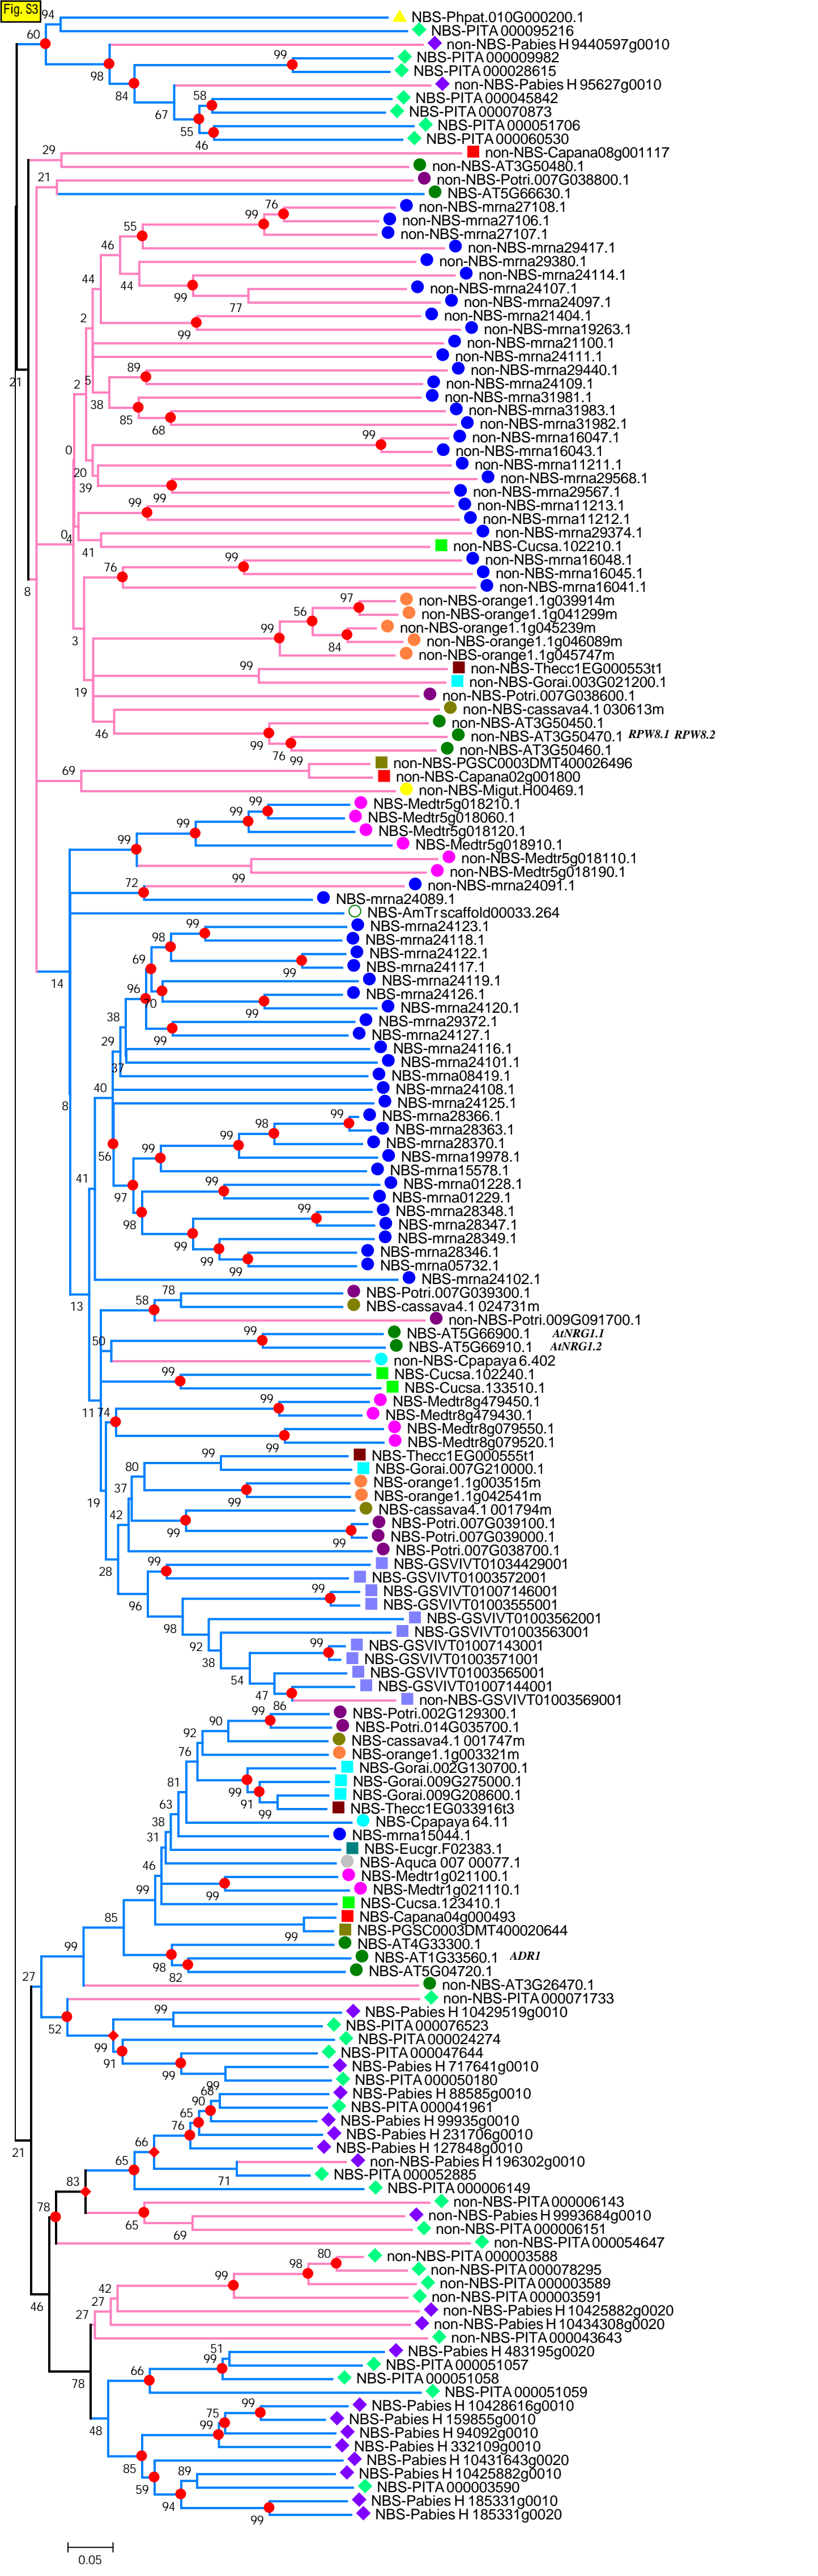

Fig. S4

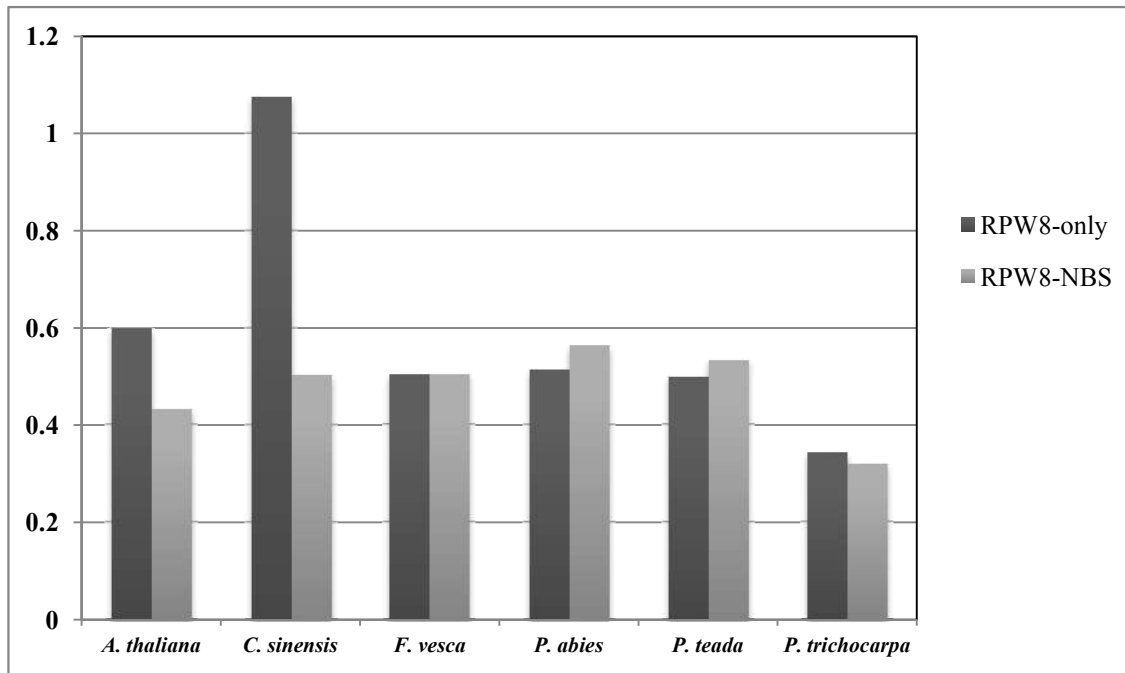

Table S1. Online databases for 35 species in this study.

| Species                           | Database                               |                                                                                                                                                                                       |
|-----------------------------------|----------------------------------------|---------------------------------------------------------------------------------------------------------------------------------------------------------------------------------------|
| <i>Citrus sinensis</i>            | v1.1                                   |                                                                                                                                                                                       |
| <i>Theobroma cacao</i>            | v1.1                                   |                                                                                                                                                                                       |
| <i>Gossypium raimondii</i>        | v2.1                                   |                                                                                                                                                                                       |
| <i>Carica papaya</i>              | ASGPBv0.4                              |                                                                                                                                                                                       |
| <i>Arabidopsis thaliana</i>       | TAIR10                                 |                                                                                                                                                                                       |
| <i>Eucalyptus grandis</i>         | v1.1                                   |                                                                                                                                                                                       |
| <i>Cucumis sativus</i>            | v1.0                                   |                                                                                                                                                                                       |
| <i>Populus trichocarpa</i>        | v3.0                                   |                                                                                                                                                                                       |
| <i>Manihot esculenta</i>          | v4.1                                   |                                                                                                                                                                                       |
| <i>Medicago truncatula</i>        | Mt4.0v1                                |                                                                                                                                                                                       |
| <i>Fragaria vesca</i>             | v1.1                                   |                                                                                                                                                                                       |
| <i>Vitis vinifera</i>             | Genoscope.12X                          |                                                                                                                                                                                       |
| <i>Solanum tuberosum</i>          | v3.4                                   |                                                                                                                                                                                       |
| <i>Mimulus guttatus</i>           | v2.0                                   | Phytozome                                                                                                                                                                             |
| <i>Aquilegia coerulea</i>         | v1.1                                   |                                                                                                                                                                                       |
| <i>Oryza sativa</i>               | v7.0                                   |                                                                                                                                                                                       |
| <i>Brachypodium distachyon</i>    | v2.1                                   |                                                                                                                                                                                       |
| <i>Setaria italica</i>            | v2.1                                   |                                                                                                                                                                                       |
| <i>Panicum virgatum</i>           | v1.1                                   |                                                                                                                                                                                       |
| <i>Sorghum bicolor</i>            | v2.1                                   |                                                                                                                                                                                       |
| <i>Zea mays</i>                   | 6a                                     |                                                                                                                                                                                       |
| <i>Selaginella moellendorffii</i> | v1.0                                   |                                                                                                                                                                                       |
| <i>Physcomitrella patens</i>      | v3.0                                   |                                                                                                                                                                                       |
| <i>Chlamydomonas reinhardtii</i>  | v5.5                                   |                                                                                                                                                                                       |
| <i>Volvox carteri</i>             | v2.0                                   |                                                                                                                                                                                       |
| <i>Micromonas pusilla</i>         | v3.0                                   |                                                                                                                                                                                       |
| <i>Coccomyxa subellipsoidea</i>   | v2.0                                   |                                                                                                                                                                                       |
| <i>Ostreococcus lucimarinus</i>   | v2.0                                   |                                                                                                                                                                                       |
| <i>Klebsormidium flaccidum</i>    | v1.0                                   | <a href="http://www.plantmorphogenesis.bio.titech.ac.jp/~algae_genome_project/klebsormidium/">http://www.plantmorphogenesis.bio.titech.ac.jp/~algae_genome_project/klebsormidium/</a> |
| <i>Amborella trichopoda</i>       | Amborella Genome Database              | <a href="http://www.amborella.org/">http://www.amborella.org/</a>                                                                                                                     |
| <i>Capsicum annuum</i>            | The Pepper Genome Database (release 2. | <a href="http://pepperseq.uencc.genomics.cn/page/specie">http://pepperseq.uencc.genomics.cn/page/specie</a>                                                                           |
| <i>Picea abies</i>                | Spruce Genome Project                  | <a href="http://congenie.org/start">http://congenie.org/start</a>                                                                                                                     |
| <i>Pinus teada</i>                | Dendrome                               | <a href="http://dendrome.ucdavis.edu/index.php">http://dendrome.ucdavis.edu/index.php</a>                                                                                             |
| <i>Spirogyra pratensis</i>        | NCBI-GBSM01000000                      | NCBI                                                                                                                                                                                  |
| <i>Coleochaete orbicularis</i>    | NCBI-GBSL01000000                      | NCBI                                                                                                                                                                                  |

Table S2. RPW8-encoding genes in 20 plant species.

| Species                     | Gene ID                   | CDS length (bp) | RPW8 domain length (bp) | exon No. | NBS | NBS-LRR | Chromosome/Scaffold Id/Contig | Start     | End       |
|-----------------------------|---------------------------|-----------------|-------------------------|----------|-----|---------|-------------------------------|-----------|-----------|
| <i>Amborella trichopoda</i> | AmTT_scan1<br>old00033.26 | 2550            | 414                     | 5        | Y   | Y       | scaffold00033                 | 5761364   | 5762334   |
| <i>Aquilegia coerulea</i>   | Aquca_007_00077.1         | 2457            | 369                     | 5        | Y   | Y       | scaffold_7                    | 701748    | 704975    |
| <i>Arabidopsis thaliana</i> | At1G55500                 | 2364            | 339                     | 5        | Y   | Y       | Chr1                          | 12168768  | 12172005  |
|                             | At1G52040                 | 666             | 327                     | 2        | N   | N       | Chr3                          | 9686098   | 9687642   |
|                             | At1G50430                 | 570             | 441                     | 2        | N   | N       | Chr3                          | 18722415  | 18723135  |
|                             | At1G50400                 | 618             | 441                     | 2        | N   | N       | Chr3                          | 18727840  | 18728649  |
|                             | At1G50410                 | 642             | 441                     | 2        | N   | N       | Chr3                          | 18729054  | 18730269  |
|                             | At1G50400                 | 603             | 450                     | 2        | N   | N       | Chr3                          | 18733068  | 18734388  |
|                             | At1G55500                 | 2451            | 354                     | 5        | Y   | Y       | Chr4                          | 16051051  | 16056526  |
|                             | At1G50410                 | 2436            | 348                     | 5        | Y   | Y       | Chr5                          | 1360712   | 1363884   |
|                             | At1G50030                 | 2109            | 450                     | 10       | Y   | N       | Chr5                          | 26592648  | 26595922  |
|                             | At1G50090                 | 2430            | 372                     | 5        | Y   | Y       | Chr5                          | 26714764  | 26717788  |
| At1G50091                   | 2448                      | 366             | 5                       | Y        | Y   | Chr5    | 26718232                      | 26721256  |           |
| <i>Carica papaya</i>        | Cpapaya_6.402             | 1470            | 411                     | 5        | N   | N       | supercontig_6                 | 3028114   | 3030720   |
|                             | Cpapaya_64.11             | 1275            | 348                     | 3        | Y   | N       | supercontig_64                | 53403     | 55286     |
| <i>Capsicum annuum</i>      | Capana02g001800           | 483             | 429                     | 1        | N   | N       | Chr02                         | 133222823 | 133223305 |
|                             | Capana04g000493           | 2496            | 357                     | 6        | Y   | Y       | Chr04                         | 7892720   | 7896457   |
|                             | Capana08g001117           | 3000            | 294                     | 4        | N   | N       | Chr08                         | 125406221 | 125412301 |
| <i>Citrus sinensis</i>      | orange1.1g003321m         | 2493            | 354                     | 5        | Y   | Y       | scaffold00002                 | 2437944   | 2441485   |
|                             | orange1.1g003515m         | 2445            | 399                     | 5        | Y   | Y       | scaffold00006                 | 2012365   | 2016272   |
|                             | orange1.1g0039914m        | 336             | 285                     | 1        | N   | N       | scaffold08131                 | 1446      | 1781      |
|                             | orange1.1g0041299m        | 312             | 282                     | 1        | N   | N       | scaffold05423                 | 643       | 954       |
|                             | orange1.1g0042541m        | 2085            | 417                     | 5        | Y   | Y       | scaffold00180                 | 250621    | 253232    |
|                             | orange1.1g0045239m        | 324             | 303                     | 2        | N   | N       | scaffold00763                 | 37156     | 37515     |

|                                      |                       |      |                   |    |   |   |                   |          |          |
|--------------------------------------|-----------------------|------|-------------------|----|---|---|-------------------|----------|----------|
|                                      | orange1.1g0<br>45747m | 399  | 306               | 3  | N | N | scaffold00<br>981 | 40295    | 41560    |
|                                      | orange1.1g0<br>46089m | 423  | 405               | 1  | N | N | scaffold11<br>071 | 611      | 1033     |
| <b><i>Cucumis<br/>sativus</i></b>    | Cucsa.10221<br>0.1    | 553  | 399               | 1  | N | N | scaffold00<br>927 | 1271260  | 1271812  |
|                                      | Cucsa.10224<br>0.1    | 2457 | 402               | 5  | Y | Y | scaffold00<br>927 | 1284165  | 1287483  |
|                                      | Cucsa.12341<br>0.1    | 2466 | 363               | 5  | Y | Y | scaffold01<br>000 | 636437   | 639759   |
|                                      | Cucsa.13351<br>0.1    | 2442 | 396               | 5  | Y | Y | scaffold01<br>037 | 1191620  | 1196158  |
| <b><i>Eucalyptus<br/>grandis</i></b> | Eucgr.F0238<br>3.1    | 2511 | 360               | 5  | Y | Y | scaffold_6        | 32551011 | 32554750 |
|                                      | mrna01228.1           | 1818 | 183               | 6  | Y | N | LG6               | 31488994 | 31492294 |
|                                      | mrna01229.1           | 2454 | 426               | 6  | Y | Y | LG6               | 31492915 | 31495971 |
|                                      | mrna05732.1           | 2445 | 393               | 6  | Y | Y | LG1               | 14782896 | 14786278 |
|                                      | mrna08419.1           | 2457 | 417               | 5  | Y | Y | LG2               | 14023879 | 14027081 |
|                                      | mrna11211.1           | 792  | 321               | 1  | N | N | LG2               | 16864230 | 16865021 |
|                                      | mrna11212.1           | 990  | 405               | 1  | N | N | LG2               | 16866646 | 16867635 |
|                                      | mrna11213.1           | 1146 | 387<br>342        | 1  | N | N | LG2               | 16868596 | 16869741 |
|                                      | mrna15044.1           | 2463 | 357               | 5  | Y | Y | LG2               | 21836852 | 21839721 |
|                                      | mrna15578.1           | 2142 | 426               | 5  | Y | Y | LG6               | 15070397 | 15074111 |
|                                      | mrna16041.1           | 3183 | 420<br>402<br>345 | 7  | N | N | LG5               | 6124518  | 6129059  |
|                                      | mrna16043.1           | 804  | 339               | 1  | N | N | LG5               | 6134715  | 6135518  |
|                                      | mrna16045.1           | 2508 | 393               | 5  | N | N | LG5               | 6140846  | 6144228  |
|                                      | mrna16047.1           | 1488 | 339<br>393        | 4  | N | N | LG5               | 6149187  | 6153682  |
|                                      | mrna16048.1           | 1671 | 246<br>282        | 6  | N | N | LG5               | 6166066  | 6171911  |
|                                      | mrna19263.1           | 2643 | 402               | 9  | N | N | LG7               | 2914972  | 2920484  |
|                                      | mrna19978.1           | 2409 | 345               | 11 | Y | Y | LG3               | 7320849  | 7327031  |
|                                      | mrna21100.1           | 816  | 375               | 3  | N | N | LG1               | 16803476 | 16805114 |
|                                      | mrna21404.1           | 651  | 405               | 1  | N | N | LG7               | 18430403 | 18431053 |
|                                      | mrna24089.1           | 3441 | 417               | 13 | Y | Y | LG6               | 35793699 | 35799209 |
|                                      | mrna24091.1           | 378  | 249               | 3  | N | N | LG6               | 35801999 | 35802575 |
|                                      | mrna24097.1           | 1659 | 387               | 6  | N | N | LG6               | 35830446 | 35833105 |
|                                      | mrna24101.1           | 1926 | 354               | 6  | Y | Y | LG6               | 35845330 | 35848452 |
|                                      | mrna24102.1           | 2769 | 249               | 8  | Y | Y | LG6               | 35851523 | 35860727 |
|                                      | mrna24107.1           | 744  | 408               | 1  | N | N | LG6               | 35880246 | 35880989 |
|                                      | mrna24108.1           | 4491 | 429               | 13 | Y | Y | LG6               | 35883724 | 35891343 |





|                                          |                                |      |     |   |   |   |                   |          |          |
|------------------------------------------|--------------------------------|------|-----|---|---|---|-------------------|----------|----------|
|                                          | Gorai.009G2<br>08600.1         | 2475 | 363 | 5 | Y | Y | Chr09             | 16176375 | 16179693 |
|                                          | Gorai.009G2<br>75000.1         | 2475 | 357 | 5 | Y | Y | Chr09             | 23037251 | 23040655 |
| <b><i>Manihot<br/>esculenta</i></b>      | cassava4.1_0<br>01747m         | 2484 | 366 | 5 | Y | Y | scaffold05<br>162 | 405801   | 408903   |
|                                          | cassava4.1_0<br>01794m         | 2457 | 420 | 5 | Y | Y | scaffold03<br>235 | 409475   | 413290   |
|                                          | cassava4.1_0<br>24731m         | 2382 | 420 | 5 | Y | Y | scaffold09<br>421 | 6451     | 10308    |
|                                          | cassava4.1_0<br>30613m         | 576  | 369 | 1 | N | N | scaffold09<br>421 | 99835    | 100410   |
| <b><i>Medicago<br/>truncatula</i></b>    | Medtr1g021<br>100.1            | 2475 | 363 | 5 | Y | Y | chr1              | 6261121  | 6265384  |
|                                          | Medtr1g021<br>110.1            | 2472 | 363 | 6 | Y | Y | chr1              | 6269491  | 6273574  |
|                                          | Medtr5g018<br>060.1            | 2490 | 381 | 5 | Y | Y | chr5              | 6713433  | 6718035  |
|                                          | Medtr5g018<br>110.1            | 1461 | 381 | 4 | N | N | chr5              | 6730004  | 6732554  |
|                                          | Medtr5g018<br>120.1            | 2418 | 366 | 5 | Y | Y | chr5              | 6736080  | 6741242  |
|                                          | Medtr5g018<br>190.1            | 1305 | 426 | 5 | N | N | chr5              | 6759973  | 6762804  |
|                                          | Medtr5g018<br>210.1            | 2511 | 399 | 5 | Y | N | chr5              | 6770214  | 6775384  |
|                                          | Medtr5g018<br>910.1            | 1848 | 366 | 6 | Y | Y | chr5              | 7095143  | 7099246  |
|                                          | Medtr8g079<br>520.1            | 2397 | 378 | 5 | Y | Y | chr8              | 34109545 | 34112741 |
|                                          | Medtr8g079<br>550.1            | 2376 | 390 | 6 | Y | Y | chr8              | 34121389 | 34124561 |
|                                          | Medtr8g479<br>430.1            | 2442 | 354 | 5 | Y | Y | chr8              | 33865889 | 33870488 |
|                                          | Medtr8g479<br>450.1            | 2463 | 354 | 5 | Y | Y | chr8              | 33882021 | 33891813 |
| <b><i>Mimulus<br/>guttatus</i></b>       | Migut.H004<br>69.1             | 573  | 384 | 3 | N | N | scaffold_8        | 2853452  | 2856954  |
| <b><i>Physcomitrell<br/>a patens</i></b> | Phpat.010G0<br>00200.1         | 2277 | 303 | 2 | Y | Y | Chr10             | 9832     | 12153    |
|                                          | rabies_H_1<br>0425882g00<br>10 | 1570 | 402 | 5 | Y | N | MA_1042<br>5882   | 1        | 2323     |

|                    |                           |      |     |    |   |                   |                   |        |        |
|--------------------|---------------------------|------|-----|----|---|-------------------|-------------------|--------|--------|
| <i>Picea abies</i> | Pabies_H_1<br>0425882g00  | 684  | 375 | 1  | N | N                 | MA_1042<br>5882   | 2822   | 3505   |
|                    | Pabies_H_1<br>0428616g00  | 2850 | 339 | 6  | Y | Y                 | MA_1042<br>8616   | 5701   | 10569  |
|                    | Pabies_H_1<br>0429519g00  | 1707 | 306 | 5  | Y | N                 | MA_1042<br>9519   | 6544   | 10544  |
|                    | Pabies_H_1<br>0431643g00  | 2067 | 294 | 6  | Y | Y                 | MA_1043<br>1643   | 27681  | 30984  |
|                    | Pabies_H_1<br>0434308g00  | 786  | 357 | 2  | N | N                 | MA_1043<br>4308   | 2133   | 3321   |
|                    | Pabies_H_1<br>27848g0010  | 2484 | 261 | 5  | Y | Y                 | MA_1278<br>48     | 9321   | 14231  |
|                    | Pabies_H_1<br>59855g0010  | 2514 | 303 | 5  | Y | Y                 | MA_1598<br>55     | 7551   | 10830  |
|                    | Pabies_H_1<br>85331g0010  | 1986 | 366 | 7  | Y | N                 | MA_1853<br>31     | 649    | 3719   |
|                    | Pabies_H_1<br>85331g0020  | 1980 | 309 | 7  | Y | N                 | MA_1853<br>31     | 31928  | 34992  |
|                    | Pabies_H_1<br>96302g0010  | 505  | 171 | 1  | N | N                 | MA_1963<br>02     | 1      | 1952   |
|                    | Pabies_H_2<br>31706g0010  | 2421 | 264 | 6  | Y | Y                 | MA_2317<br>06     | 197    | 5229   |
|                    | Pabies_H_3<br>32109g0010  | 2595 | 402 | 5  | Y | Y                 | MA_3321<br>09     | 2518   | 6048   |
|                    | Pabies_H_4<br>83195g0020  | 762  | 372 | 2  | Y | N                 | MA_4831<br>95     | 1064   | 1934   |
|                    | Pabies_H_7<br>17641g0010  | 1509 | 396 | 3  | Y | N                 | MA_7176<br>41     | 2170   | 5221   |
|                    | Pabies_H_8<br>8585g0010   | 2625 | 243 | 11 | Y | Y                 | MA_8858<br>5      | 5371   | 13264  |
|                    | Pabies_H_9<br>4092g0010   | 3006 | 261 | 7  | Y | Y                 | MA_9409<br>2      | 10069  | 27795  |
|                    | Pabies_H_9<br>5627g0010   | 369  | 324 | 1  | N | N                 | MA_9562<br>7      | 22203  | 22571  |
|                    | Pabies_H_9<br>9935g0010   | 2547 | 210 | 8  | Y | Y                 | MA_9993<br>5      | 8587   | 17705  |
|                    | Pabies_H_9<br>993684g0010 | 648  | 216 | 1  | N | N                 | MA_9993<br>684    | 1322   | 1969   |
|                    | PITA_00000<br>3588        | 261  | 225 | 2  | N | N                 | tscaffold2<br>728 | 922420 | 942848 |
| PITA_00000<br>3589 | 606                       | 300  | 4   | N  | N | tscaffold2<br>728 | 973368            | 991655 |        |
| PITA_00000<br>3590 | 2344                      | 312  | 5   | Y  | Y | tscaffold2<br>728 | 987211            | 991371 |        |

|                    |                    |      |     |    |   |   |                      |         |         |
|--------------------|--------------------|------|-----|----|---|---|----------------------|---------|---------|
|                    | PITA_00000<br>3591 | 711  | 408 | 3  | N | N | tscaffold2<br>728    | 1016297 | 1045500 |
|                    | PITA_00000<br>6143 | 1062 | 216 | 4  | N | N | tscaffold6<br>318    | 235743  | 270174  |
|                    | PITA_00000<br>6149 | 4002 | 279 | 15 | Y | Y | tscaffold6<br>318    | 662631  | 745722  |
|                    | PITA_00000<br>6151 | 720  | 270 | 3  | N | N | tscaffold6<br>318    | 745851  | 757573  |
|                    | PITA_00000<br>9982 | 2574 | 420 | 2  | Y | Y | tscaffold5<br>447    | 278573  | 285210  |
|                    | PITA_00002<br>4274 | 2686 | 306 | 6  | Y | Y | scaffold12<br>2231   | 47828   | 53145   |
|                    | PITA_00002<br>8615 | 1476 | 420 | 3  | Y | N | tscaffold5<br>112    | 188105  | 190105  |
|                    | PITA_00004<br>1961 | 4041 | 222 | 10 | Y | Y | tscaffold1<br>651    | 116846  | 130645  |
|                    | PITA_00004<br>3643 | 606  | 417 | 2  | N | N | tscaffold5<br>932    | 125112  | 131276  |
|                    | PITA_00004<br>5842 | 2946 | 420 | 3  | Y | Y | scaffold17<br>4363   | 80559   | 83764   |
| <i>Pinus teada</i> | PITA_00004<br>7644 | 2490 | 375 | 5  | Y | Y | scaffold16<br>1984.1 | 51936   | 56450   |
|                    | PITA_00005<br>0180 | 1551 | 378 | 3  | Y | N | scaffold20<br>7348   | 21783   | 24502   |
|                    | PITA_00005<br>1057 | 1053 | 315 | 2  | Y | N | tscaffold4<br>491    | 6108    | 7260    |
|                    | PITA_00005<br>1058 | 3180 | 342 | 8  | Y | Y | tscaffold4<br>491    | 67227   | 101098  |
|                    | PITA_00005<br>1059 | 1392 | 285 | 5  | Y | N | tscaffold4<br>491    | 101137  | 105416  |
|                    | PITA_00005<br>1706 | 1611 | 414 | 3  | Y | N | scaffold18<br>7916   | 16991   | 18762   |
|                    | PITA_00005<br>2885 | 3020 | 294 | 8  | Y | Y | tscaffold6<br>760    | 33671   | 86151   |
|                    | PITA_00005<br>4647 | 2880 | 210 | 2  | N | N | tscaffold7<br>514    | 44656   | 53133   |
|                    | PITA_00006<br>0530 | 771  | 420 | 3  | Y | N | scaffold11<br>1707   | 42532   | 50053   |
|                    | PITA_00007<br>0873 | 1899 | 384 | 3  | Y | Y | scaffold60<br>4736.2 | 3434    | 21290   |
|                    | PITA_00007<br>1733 | 630  | 237 | 3  | N | N | scaffold13<br>4707.2 | 7932    | 14719   |
|                    | PITA_00007<br>6523 | 2658 | 306 | 6  | Y | Y | scaffold12<br>2376   | 30140   | 35575   |
|                    | PITA_00007<br>8295 | 2830 | 255 | 7  | N | N | scaffold68<br>6995.2 | 13007   | 16717   |
|                    | PITA_00009<br>5216 | 1560 | 291 | 2  | Y | N | scaffold77<br>7069   | 4155    | 6980    |

|                                       |                        |      |     |   |   |   |            |          |          |
|---------------------------------------|------------------------|------|-----|---|---|---|------------|----------|----------|
|                                       | Potri.002G1<br>29300.1 | 2499 | 390 | 5 | Y | Y | Chr02      | 9688292  | 9692231  |
|                                       | Potri.007G0<br>38600.1 | 585  | 417 | 1 | N | N | Chr07      | 3030883  | 3031467  |
|                                       | Potri.007G0<br>38700.1 | 2664 | 318 | 5 | Y | Y | Chr07      | 3032024  | 3035768  |
|                                       | Potri.007G0<br>38800.1 | 468  | 204 | 2 | N | N | Chr07      | 3074765  | 3075984  |
| <b><i>Populus<br/>trichocarpa</i></b> | Potri.007G0<br>39000.1 | 2514 | 429 | 5 | Y | Y | Chr07      | 3106262  | 3110720  |
|                                       | Potri.007G0<br>39100.1 | 2514 | 426 | 5 | Y | Y | Chr07      | 3118478  | 3122925  |
|                                       | Potri.007G0<br>39300.1 | 2415 | 372 | 5 | Y | Y | Chr07      | 3131037  | 3134419  |
|                                       | Potri.009G0<br>91700.1 | 399  | 333 | 2 | N | N | Chr09      | 8382496  | 8383012  |
|                                       | Potri.014G0<br>35700.1 | 2505 | 378 | 5 | Y | Y | Chr14      | 2926821  | 2930154  |
|                                       | FGSC0003D<br>MT4000206 | 2499 | 354 | 6 | Y | Y | chr04      | 60894536 | 60898248 |
| <b><i>Solanum<br/>tuberosum</i></b>   | FGSC0003D<br>MT4000264 | 501  | 423 | 1 | N | N | chr02      | 53873970 | 53874770 |
|                                       | Thecc1EG00<br>0553t1   | 1164 | 369 | 6 | N | N | scaffold_1 | 2292508  | 2295616  |
| <b><i>Theobroma<br/>cacao</i></b>     | Thecc1EG00<br>0555t1   | 2463 | 396 | 5 | Y | Y | scaffold_1 | 2298768  | 2303064  |
|                                       | Thecc1EG03<br>3916t3   | 2571 | 360 | 4 | Y | Y | scaffold_8 | 673294   | 676598   |
|                                       | GSVIVT010<br>03555001  | 1623 | 378 | 5 | Y | N | chr7       | 14606893 | 14611837 |
|                                       | GSVIVT010<br>03562001  | 2562 | 261 | 9 | Y | Y | chr7       | 14663873 | 14668801 |
|                                       | GSVIVT010<br>03563001  | 3747 | 231 | 9 | Y | Y | chr7       | 14675185 | 14682521 |
|                                       | GSVIVT010<br>03565001  | 1908 | 387 | 6 | Y | Y | chr7       | 14696279 | 14699748 |
|                                       | GSVIVT010<br>03569001  | 741  | 381 | 2 | N | N | chr7       | 14731136 | 14732465 |
|                                       | GSVIVT010<br>03571001  | 2445 | 405 | 5 | Y | Y | chr7       | 14739469 | 14742604 |
| <b><i>Vitis vinifera</i></b>          | GSVIVT010<br>03572001  | 2112 | 348 | 7 | Y | Y | chr7       | 14743074 | 14755623 |
|                                       | GSVIVT010<br>07143001  | 3048 | 390 | 7 | Y | Y | chrUn      | 30439226 | 30447469 |

|                       |      |     |    |   |   |       |          |          |  |
|-----------------------|------|-----|----|---|---|-------|----------|----------|--|
|                       |      | 177 |    |   |   |       |          |          |  |
| GSVIVT010<br>07144001 | 4890 | 381 | 14 | Y | Y | chrUn | 30449202 | 30462178 |  |
|                       |      | 360 |    |   |   |       |          |          |  |
| GSVIVT010<br>07146001 | 1761 | 378 | 7  | Y | N | chrUn | 30467699 | 30474275 |  |
| GSVIVT010<br>34429001 | 2595 | 369 | 6  | Y | Y | chr10 | 16353639 | 16361287 |  |

Table S3. Domain organizations of RPW8-containing proteins.

| <i>A. trichopoda</i> |               | <i>E. grandis</i>    |               | <i>M. guttatus</i>    |               |
|----------------------|---------------|----------------------|---------------|-----------------------|---------------|
| Domain               | Number        | Domain               | Number        | Domain                | Number        |
| RPW8                 | 1             | RPW8                 | 1             | RPW8                  | 1             |
| NB-ARC               | 1             | NB-ARC               | 1             | <i>P. patens</i>      |               |
| LRR                  | 1             | LRR                  | 1             | <b>Domain</b>         | <b>Number</b> |
| <i>A. coerulea</i>   |               | <i>F. vesca</i>      |               | RPW8                  | 1             |
| <b>Domain</b>        | <b>Number</b> | <b>Domain</b>        | <b>Number</b> | NB-ARC                | 1             |
| RPW8                 | 1             | RPW8                 | 71            | LRR                   | 1             |
| NB-ARC               | 1             | NB-ARC               | 35            | <i>P. abies</i>       |               |
| LRR                  | 1             | LRR                  | 29            | <b>Domain</b>         | <b>Number</b> |
| <i>A. thaliana</i>   |               | Pkinase_Tyr          | 5             | RPW8                  | 21            |
| <b>Domain</b>        | <b>Number</b> | DUF677               | 2             | NB-ARC                | 15            |
| RPW8                 | 11            | Peptidase_C48        | 2             | LRR                   | 12            |
| NB-ARC               | 6             | IQ                   | 1             | <i>P. teada</i>       |               |
| LRR                  | 5             | Calmodulin_bin       | 1             | RPW8                  | 27            |
| LIM                  | 1             | Pkinase              | 1             | NB-ARC                | 24            |
| DUF3633              | 1             | POX                  | 1             | LRR                   | 13            |
| <i>C. annuum</i>     |               | PP2                  | 1             | <i>P. trichocarpa</i> |               |
| <b>Domain</b>        | <b>Number</b> | RVT_3                | 1             | <b>Domain</b>         | <b>Number</b> |
| RPW8                 | 3             | zf-RING_2            | 1             | RPW8                  | 9             |
| NB-ARC               | 1             | ConA-like            | 1             | NB-ARC                | 6             |
| LRR                  | 1             | <i>G. raimondii</i>  |               | LRR                   | 6             |
| U-box                | 1             | <b>Domain</b>        | <b>Number</b> | <i>S. tuberosum</i>   |               |
| ARM repeat           | 1             | RPW8                 | 5             | <b>Domain</b>         | <b>Number</b> |
| <i>C. papaya</i>     |               | NB-ARC               | 4             | RPW8                  | 2             |
| <b>Domain</b>        | <b>Number</b> | LRR                  | 4             | NB-ARC                | 1             |
| RPW8                 | 2             | Reticulon            | 1             | LRR                   | 1             |
| NB-ARC               | 1             | <i>M. esculenta</i>  |               | <i>T. cacao</i>       |               |
| <i>C. sinensis</i>   |               | <b>Domain</b>        | <b>Number</b> | <b>Domain</b>         | <b>Number</b> |
| <b>Domain</b>        | <b>Number</b> | RPW8                 | 4             | RPW8                  | 3             |
| RPW8                 | 8             | NB-ARC               | 3             | NB-ARC                | 2             |
| NB-ARC               | 3             | LRR                  | 3             | LRR                   | 2             |
| LRR                  | 3             | <i>M. truncatula</i> |               | Reticulon             | 1             |
| <i>C. sativus</i>    |               | <b>Domain</b>        | <b>Number</b> | <i>V. vinifera</i>    |               |
| <b>Domain</b>        | <b>Number</b> | RPW8                 | 12            | <b>Domain</b>         | <b>Number</b> |
| RPW8                 | 4             | NB-ARC               | 10            | RPW8                  | 13            |
| NB-ARC               | 3             | LRR                  | 14            | NB-ARC                | 14            |
| LRR                  | 3             | Reticulon            | 2             | LRR                   | 8             |
| <i>C. sativus</i>    |               | LIM                  | 1             | <i>V. vinifera</i>    |               |
| <b>Domain</b>        | <b>Number</b> | <i>M. truncatula</i> |               | <b>Domain</b>         | <b>Number</b> |
| RPW8                 | 4             | RPW8                 | 12            | RPW8                  | 13            |
| NB-ARC               | 3             | NB-ARC               | 10            | NB-ARC                | 14            |
| LRR                  | 3             | LRR                  | 14            | LRR                   | 8             |
| <i>C. sativus</i>    |               | Reticulon            | 2             | <i>V. vinifera</i>    |               |
| <b>Domain</b>        | <b>Number</b> | LIM                  | 1             | <b>Domain</b>         | <b>Number</b> |
| RPW8                 | 4             | <i>M. truncatula</i> |               | RPW8                  | 13            |
| NB-ARC               | 3             | RPW8                 | 12            | NB-ARC                | 14            |
| LRR                  | 3             | NB-ARC               | 10            | LRR                   | 8             |
| <i>C. sativus</i>    |               | LRR                  | 14            | <i>V. vinifera</i>    |               |
| <b>Domain</b>        | <b>Number</b> | Reticulon            | 2             | <b>Domain</b>         | <b>Number</b> |
| RPW8                 | 4             | LIM                  | 1             | RPW8                  | 13            |
| NB-ARC               | 3             | <i>M. truncatula</i> |               | NB-ARC                | 14            |
| LRR                  | 3             | RPW8                 | 12            | LRR                   | 8             |
| <i>C. sativus</i>    |               | NB-ARC               | 10            | <i>V. vinifera</i>    |               |
| <b>Domain</b>        | <b>Number</b> | LRR                  | 14            | <b>Domain</b>         | <b>Number</b> |
| RPW8                 | 4             | Reticulon            | 2             | RPW8                  | 13            |
| NB-ARC               | 3             | LIM                  | 1             | NB-ARC                | 14            |
| LRR                  | 3             | <i>M. truncatula</i> |               | LRR                   | 8             |

| <b>Domain</b>   | <b>Total Number</b> |
|-----------------|---------------------|
| RPW8            | 200                 |
| NB-ARC          | 132                 |
| LRR             | 108                 |
| Pkinase_Tyr     | 5                   |
| Reticulon       | 4                   |
| DUF677          | 2                   |
| LIM             | 2                   |
| Peptidase_C48   | 2                   |
| ARM repeat      | 1                   |
| Calmodulin_binc | 1                   |
| ConA-like       | 1                   |
| DUF3633         | 1                   |
| IQ              | 1                   |
| Pkinase         | 1                   |
| POX             | 1                   |
| PP2             | 1                   |
| RVT_3           | 1                   |
| U-box           | 1                   |
| zf-RING_2       | 1                   |



Table S4. *Ks* values of RPW8-encoding genes in each species.

| Species            | <i>Ks</i> vaule | Species              | <i>Ks</i> vaule |
|--------------------|-----------------|----------------------|-----------------|
|                    | 0.296324        |                      | 0.238317        |
|                    | 0.638099        |                      | 0.218529        |
| <i>A. thaliana</i> | 0.70326         |                      | 0.218799        |
|                    | 0.742945        |                      | 0.237231        |
|                    | 0.895805        | <i>M. truncatula</i> | 0.315534        |
|                    |                 |                      | 0.68588         |
|                    | 0.014724        |                      | 0.738901        |
|                    | 0.028205        |                      | 0.875369        |
| <i>C.sinensis</i>  | 0.156592        |                      | 1.246927        |
|                    | 0.170084        |                      |                 |
|                    | 0.281375        |                      | 0.109016        |
|                    |                 |                      | 0.131151        |
| <i>C. sativus</i>  | 1.0137          |                      | 0.229321        |
|                    |                 |                      | 0.367307        |
|                    | 0.024254        |                      | 0.372124        |
|                    | 0.043177        |                      | 0.382737        |
|                    | 0.08051         |                      | 0.401711        |
|                    | 0.124036        | <i>P. abies</i>      | 0.427993        |
|                    | 0.211735        |                      | 0.475985        |
|                    | 0.236512        |                      | 0.546616        |
|                    | 0.248195        |                      | 0.63113         |
|                    | 0.261466        |                      | 0.747102        |
|                    | 0.31276         |                      | 0.761284        |
|                    | 0.315348        |                      | 0.790796        |
|                    | 0.346029        |                      |                 |
|                    | 0.350175        |                      | 0.134945        |
|                    | 0.365908        |                      | 0.166262        |
|                    | 0.462484        |                      | 0.203998        |
|                    | 0.469222        |                      | 0.20593         |
|                    | 0.497592        |                      | 0.250045        |
|                    | 0.541645        |                      | 0.391968        |
| <i>F. vesca</i>    | 0.656485        |                      | 0.418402        |
|                    | 0.693745        |                      | 0.421878        |
|                    | 0.747956        |                      | 0.446169        |
|                    | 0.755354        |                      | 0.497016        |
|                    | 0.782284        | <i>P. teada</i>      | 0.520007        |
|                    | 0.8449          |                      | 0.559645        |
|                    | 0.870067        |                      | 0.641894        |
|                    | 0.972978        |                      | 0.657876        |
|                    | 0.999978        |                      | 0.958137        |
|                    | 1.008641        |                      | 1.111261        |
|                    | 1.02184         |                      | 1.159425        |
|                    | 1.032447        |                      | 1.990661        |
|                    | 1.093547        |                      | N/C             |
|                    | 1.11924         |                      | N/C             |
|                    | 1.124987        |                      |                 |

|                     |          |                       |          |
|---------------------|----------|-----------------------|----------|
|                     | 1.330243 |                       | 0.01657  |
|                     | 1.583403 | <i>P. trichocarpa</i> | 0.27559  |
|                     | 2.68922  |                       | 0.41044  |
| <i>G. raimondii</i> | 0.609192 |                       | 0.021408 |
|                     | 0.681905 | <i>V. vinifera</i>    | 0.032995 |
|                     |          |                       | 0.157034 |
|                     |          |                       | 0.589033 |

---

Table S5. Tandem clusters of RPW8-encoding genes on chromosomes or scaffolds in species.

| Species            | <i>A. thaliana</i>  | <i>C. sativus</i> | <i>F. vesca</i> | <i>M. esculenta</i> | <i>M. truncatula</i> | <i>P. abies</i>    | <i>P. teada</i> | <i>P. trichocarpa</i> | <i>T. cacao</i> | <i>V. vinifera</i> |
|--------------------|---------------------|-------------------|-----------------|---------------------|----------------------|--------------------|-----------------|-----------------------|-----------------|--------------------|
| <b>Cluster No.</b> | <b>2</b>            | <b>1</b>          | <b>11</b>       | <b>1</b>            | <b>4</b>             | <b>2</b>           | <b>2</b>        | <b>1</b>              | <b>1</b>        | <b>2</b>           |
| 1                  | Chr3/4 <sup>a</sup> | scaffold00927/2   | LG2/3           | scaffold09421/2     | Chr1/2               | IVIA_10<br>425882/ | tscaffold2728/4 | Chr7/6                | scaffold_1/2    | Chr7/7             |
| 2                  | Chr5/3              | -                 | LG4/4           | -                   | Chr5/5               | MA_18<br>5331/2    | tscaffold4491/3 | -                     | -               | ChrUn/3            |
| 3                  | -                   | -                 | LG5/3           | -                   | Chr8/2               | -                  | -               | -                     | -               | -                  |
| 4                  | -                   | -                 | LG5/5           | -                   | Chr8/2               | -                  | -               | -                     | -               | -                  |
| 5                  | -                   | -                 | LG5/3           | -                   | -                    | -                  | -               | -                     | -               | -                  |
| 6                  | -                   | -                 | LG6/2           | -                   | -                    | -                  | -               | -                     | -               | -                  |
| 7                  | -                   | -                 | LG6/17          | -                   | -                    | -                  | -               | -                     | -               | -                  |
| 8                  | -                   | -                 | LG6/3           | -                   | -                    | -                  | -               | -                     | -               | -                  |
| 9                  | -                   | -                 | LG6/3           | -                   | -                    | -                  | -               | -                     | -               | -                  |
| 10                 | -                   | -                 | unanchored/3    | -                   | -                    | -                  | -               | -                     | -               | -                  |
| 11                 | -                   | -                 | unanchored/2    | -                   | -                    | -                  | -               | -                     | -               | -                  |

<sup>a</sup> Gene number of each tandem cluster
